# Supplementary material for: Traits Explaining Durum Wheat (Triticum turgidum L. spp. Durum) Yield in Dry Chilean Mediterranean Environments
Source: PubMed Central journal article supplement (PMC5654942; doi:10.3389/fpls.2017.01781), 2017-10-20
Supplement: DataSheet1.pdf [file DataSheet1.pdf]

## Annex I

Description of the Durum wheat genotypes used in the study.

| GENO-TYPE | CODE              | CROSSES                                                                                                                                              | PEDIGREE                                            | ORIGIN |
|-----------|-------------------|------------------------------------------------------------------------------------------------------------------------------------------------------|-----------------------------------------------------|--------|
| 1         | LLARETA           | D67.54.4.9A//JORI'S'/ROSNER<br>DURUM 119-200-4Y/3/ SAHEL77                                                                                           | CD-64399-4P-2P-3P                                   | INIA   |
| 2         | CORCOLEN          | ALGA'S'/3/CANDEALFEN5/FLAMI<br>NGO'S'//PETREL'S'/4/CHURRILLA<br>S'S'/5/AUK'S'/6/RUFF'S'/FLAMI<br>NGO'S'//FLAMINGO'S'/CRANE'S'/3/<br>YAV79/HUITLES'S' | A-27357-0P-5P-3P-3P                                 | INIA   |
| 3         | LLEUQUE           | YEL'S'/BAR'S'/3/GR'S'/AFN//CR'S'<br>'/5/DOM'S'//CR'S'*2/GS'S'/3/SCO'S'<br>'/4/HORA/6/LAP76/GULL'S'/7/KIC<br>AN                                       | A-27735-0P-3P-1P-1P                                 | INIA   |
| 4         | QUC 3104-<br>2005 | ALTAR84/ALD'S'//STN'S'/CHEN'S'<br>'/ALTAR84/4/ATES1D                                                                                                 | A-30064-0P-0P-0P-2P                                 | INIA   |
| 5         | QUC 3497-<br>2007 | NACH'S'/CHEN'S'//RUFO'S'/ALD'<br>S'/3/SQLA'S'/7/YEL'S'/BAR'S'/3/G<br>R'S'/AFN//CR'S'/5/DOM'S'//CR'S'*<br>2/GS'S'/3/SCO'S'/4/HORA/6/<br>LAP76/GUIL'S' | A-31604-0P-0P-0P-0P-<br>5A-0C                       | INIA   |
| 7         | QUC 3672-<br>2008 | SNITAN/3/STOT//ALTAR84/ALD                                                                                                                           | CDSS99Y00645S-0M-<br>0Y-111Y-0M-0Y-1M-<br>0Y        | INIA   |
| 8         | QUC 3693-<br>2008 | GUAYACAN<br>INTA//YUAN1/GREEN18/3/SOOTY<br>9/RASCON 37                                                                                               | CDSS00Y01041T-<br>0TOPB-8Y-0BLR-5Y-<br>0B-0Y-2M-0Y  | INIA   |
| 9         | QUC 3694-<br>2008 | GUANAY/3/STOT//ALTAR84/ALD/<br>4/BINTEPE85/SULA                                                                                                      | CDSS00Y01051T-<br>0TOPB-14Y-0BLR-<br>1Y-0B-0Y-1B-0Y | INIA   |
| 10        | QUC 3738-<br>2008 | OSU-<br>3880005/3/STOT//ALTAR84/ALD/4/<br>KUCUK2/5/RASCON 37/2*TARRO2                                                                                | CDSS02Y00536S-0Y-<br>0M-20Y-0Y                      | INIA   |
| 11        | QUC 3739-<br>2008 | OSU-<br>3880005/3/STOT//ALTAR84/ALD/4/<br>KUCUK2/5/CRAKE10/RISSA                                                                                     | CDSS02Y00540S-0Y-<br>0M-22Y-0Y                      | INIA   |
| 12        | QUC 3755-<br>2008 | VANRRIKSE6.2//1 <sup>a</sup> -1D 2+12-<br>5/3*WB881                                                                                                  | CDSS98Y00665S-0M-<br>5Y-0M-0Y-0BLR-1Y-<br>0B        | INIA   |
| 13        | QUC 3757-<br>2008 | STOT//ALTAR84/ALD/3/GREEN18/<br>FOCHA1//AIRON1                                                                                                       | CDSS99B00467S-0M-<br>0Y-75Y-0M-0Y-2M-0Y             | INIA   |
| 14        | QUC 3775-<br>2008 | ATES 1-D/LLARETA INIA                                                                                                                                | A-31865-0P-0P-0P-1A-<br>1C-0C                       | INIA   |
| 15        | QUC 3347-<br>2006 | YEL'S'/BAR'S'/3/GR'S'/AFN//CR'S'/5/<br>DOM'S'//CR'S'*2/GS'S'/3/SCO'S'/4/H<br>ORA/6/LAP76/GUIL'S'/7/ALTAR84/<br>CMH82A.1062//RISSA'S'                 | A-31213-0P-0P-0P-0P-<br>4P-0C                       | INIA   |
| 16        | QUC 3698-<br>2007 | AINZEN1//HYDRANASSA30/SILVE<br>R5/3/AUK/GUIL//GREEN                                                                                                  | CDSS00B00306T-<br>0TOPY-0B-15Y-0M-<br>0Y-1B         | INIA   |

|    |               |                                                                                                                                    |                                                    |      |
|----|---------------|------------------------------------------------------------------------------------------------------------------------------------|----------------------------------------------------|------|
| 17 | QUC 3730-2008 | AJAI3/ANADE1//AFUWAN14/7/E<br>CO/CMH76A.722//YAV3/ALTAR84<br>/4/AJAI2/5/KJOVE1/6/MALMUK1/<br>SERRATOR1                             | CDSS02Y00280S-0Y-<br>0M-7Y-0Y                      | INIA |
| 18 | QUC 3731-2008 | KUCUK2/PATA2/4/ARMENT//SRN3<br>/NIGRIS4/3/CANELO9.1                                                                                | CDSS02Y00306S-0Y-<br>0M-26Y-0Y                     | INIA |
| 19 | QUC 3763-2008 | LLARETA<br>INIA/YEBAS8/3/MINIMUS6/PLATA<br>16//IMMER                                                                               | CDSS00Y01047T-<br>0TOPB-5Y-0BLR-1Y-<br>0B-0Y-1B-0Y | INIA |
| 20 | QUC 3767-2008 | LLARETA INIA/ATES 1-D                                                                                                              | A-32128-0P-0P-1A-1C-<br>0C                         | INIA |
| 21 | QUC 3769-2008 | LLARETA INIA/3/CD64399-4P-2P-<br>3P//STN'S'/GOTE'S'                                                                                | A-32139-0P-0P-1A-1C-<br>0C                         | INIA |
| 22 | QUC 3782-2008 | POHO1/4/ALTAR84/CMH82A.1062//<br>RISSA'S'/3/ACONCHI 89                                                                             | A-31900-0P-0P-0P-1A-<br>3C-0C                      | INIA |
| 23 | QUC 3788-2008 | GUAYACAN-<br>INIA/3/ALTAR84/CMH82A.1062//RI<br>SSA'S'/3/ACONCHI89                                                                  | A-31906-0P-0P-0P-1A-<br>7C-0C                      | INIA |
| 24 | QUC 3559-2009 | SOOTY9/RASCON37//STORLOM                                                                                                           | CGSS02Y00006S-2F1-<br>12Y-0B-3Y-0B-2Y-0B           | INIA |
| 25 | QUC 3501-2009 | CMH85.797//CADO/BOOMER33/4/<br>ARMENT//SRN3/NIGRIS4/3/CANEL<br>O9.1                                                                | CDSS02B01468T-<br>0TOPB-0Y-0M-5Y-<br>4M-04Y-0B     | INIA |
| 26 | QUC 3449-2009 | STORLOM/3/RASCON37/TARRO2//<br>RASCON37/4/KIRKI1/HIMAN9/5/G<br>LAS5/LOTUS4//SOMBRA20                                               | CDSS02Y01082T-<br>0TOPB-0Y-0M-11Y-<br>0Y           | INIA |
| 27 | QUC 3546-2009 | CBC<br>CHILE/5/2*AJAI16//HORA/JRO/3/<br>GAN/4/ZAR                                                                                  | CDSS02Y01222T-<br>0TOPB-0Y-0M-1Y-0Y                | INIA |
| 28 | QUC 3425-2009 | NACH'S'/CHEN'S'//RUFO'S'/ALD'<br>S'/3/SQLA'S'/4/CD 64399-4P-2P-<br>P//STN'S'/GOTE'S'                                               | A-32116-0P-0P-1A-1C-<br>1C-0C                      | INIA |
| 29 | QUC 3487-2009 | TARRO1/TISOMA2//TARRO1/3/CO<br>MBDUCK2/4/SHAG9/BUTO17/6/CH<br>EN1/TEZ/3/GUIL//CIT71/CII/4/SOR<br>A/PLATA12/5/STOT//ALTAR<br>84/ALD | CDSS02B00451S-0Y-<br>0M-4Y-2M-04Y-0B               | INIA |
| 30 | QUC 3504-2009 | MINIMUS/COMB<br>DUCK2//CHAM3/3/CANELO9/9/US<br>DA595/3/D67.3/RABI//CRA/4/ALO/5<br>/HUI/YAV1/6/ARDENTE/7/HUI/YA<br>V79/8/POD9       | CDSS02Y00259S-0Y-<br>0M-24Y-0Y                     | INIA |
| 31 | QUC 3521-2009 | TRN//21563/AA/3/BD2080/4/BD2339<br>/5/RASCON37/TARRO2//RASCON3<br>7/6/AUK/GUIL//GREEN                                              | XXX                                                | INIA |
| 32 | QUC 3541-2009 | HUBEI//SOOTY9/RASCON37/3/2*S<br>OOTY9/RASCON37/4/CRAKE10/RI<br>SSA                                                                 | CDSS02Y00587S-0Y-<br>0M-16Y-0Y                     | INIA |
| 33 | QUC 3507-2009 | ODIN15/WITNEK1//ISLOM1/5/TAR<br>RO/TISOMA2//TARRO1/3/COMB<br>DUCK2/ALAS//4*COMB<br>DUCK2/4/SHAG9/BUTO17                            | CDSS04Y00014S-21Y-<br>0M-06Y-2M-1Y-0B              | INIA |

|    |               |                                                                                                                                                  |                                              |      |
|----|---------------|--------------------------------------------------------------------------------------------------------------------------------------------------|----------------------------------------------|------|
| 34 | QUC 3448-2009 | LLARETA<br>INIA/3/ALTAR84/CMH82A.1062//RISSA'S'                                                                                                  | A-32133-0P-0P-1A-1C-6C-0C                    | INIA |
| 35 | QUC 3462-2009 | CAMAYO/GUANAY                                                                                                                                    | CDSS01B00082S-19M-0M-0Y-0Y                   | INIA |
| 36 | QUC 3484-2009 | GREEN38/BUSHEN4//PORTO3/4/ARMEN//SRN3/NIGRIS4/3/CANELO 9.1                                                                                       | CDSS02B00267S-0Y-0M-4Y-3M-04Y-0B             | INIA |
| 37 | QUC 3544-2009 | BCRIS/BICUM//LLARETA<br>INIA/3/DUKEM_12/2*RASCON_21                                                                                              | CDSS99B01189T-0TOPY-0M-0Y-81Y-0M-0Y-1M-0Y    | INIA |
| 38 | QUC 3453-2009 | D94528/3/2*STOT//ALTAR<br>84/ALD/5/TARRO1/TISOMA2//TARRO1/3/COMB<br>DUCK2/ALAS//4*COMB<br>DUCK2/4/SHAG9/BUTO7                                    | CDSS02B00639S-0Y-0M-5Y-4M-04Y-0B             | INIA |
| 39 | QUC 3465-2009 | CANELO8//SORA/2*PLATA12/4/STORLOM/3/RASCON37/TARRO2//RASCON37/5/RASCON39/TILO1                                                                   | CDSS02Y01103T-0TOPB-0Y-0M-14Y-0Y             | INIA |
| 40 | QUC 3491-2009 | GUANAY/4/YAZI_1/AKAKI4//SOMAT3/3/AUK/GUIL//GREEN/5/NUS/SULA//5*NUS/4/SULA/RBCE_2/3/HUI/CIT71/CII                                                 | CDSS02B01013T-0TOPB-0Y-0M-3Y-1M-04Y-0B       | INIA |
| 41 | QUC 3485-2009 | ARAM7//CREX/ALLA/5/ENTE/ME X2//HUI/4/YAV1/3/LD357E/2*TC60//JO69/6/CANELO9.1/7/STORLOM/3/RASCON37/TARRO2//RASCON37                                | CDSS02B00340S-0Y-0M-23Y-1M-04Y-0B            | INIA |
| 42 | QUC 3419-2009 | VR.90D015/LLOYD/4/NACH'S'/CHEN'S'//RUFO'S'/3/SQLA'S'                                                                                             | A-32098-0P-0P-1A-1C-7C-0C                    | INIA |
| 43 | QUC 3403-2009 | ALTAR84/CMH82A.1062//RISSA'S'/7/YEL'S'/BAR'S'/3/GR'S'/AFN//CR'S'/5/DOM'S'//CR'S'*2/3/SCO'S'/4/HORA/3/LAP76/GUIL'S'                               | A-32085-0P-0P-1A-1C-3C-0C                    | INIA |
| 44 | QUC 3538-2009 | TOSKA<br>26/RASCON37//SNITAN/4/ARMEN T//SRN3/NIGRIS4/3/CANELO 9.1                                                                                | CDSS02Y00395S-0Y-0M-6Y-0Y                    | INIA |
| 45 | QUC 3456-2009 | PLATA3//CREX/ALLA/3/YAZI10/4/STOT//ALTAR/COMB<br>DUCK2//CHAM3/4/ALD/7/CHEN11/POC/TANTLO/5/ENTE/MEXI2//HUI/4/YAV1/3/LD357E/2*TC60//JO69/6/MINIMUS | CDSS02B00916T-0TOPB-0Y-0M-2Y-1M-04Y-0B       | INIA |
| 46 | QUC 3503-2009 | ODIN15/WITNEK1//ISLOM1                                                                                                                           | CDSS95Y00943T-A-1Y-0M-0Y-0B-2Y-0B-0BLR-3Y-0B | INIA |
| 47 | QUC 3506-2009 | NUS/SULA//5*NUS/4/SULA/RBCE2/3/HUI//CIT71/CII/5/1A.1D 5+10-6/2*WB881//1A.1D 5+10-6/3*MOJO/3/BISU1/PATKA3                                         | CDSS02B00286S-0Y-0M-8Y-1M-04Y-0B             | INIA |
| 48 | QUC 3405-2009 | ALTAR84/CMH82A.1062//RISSA'S'/3/ALTAR84/CMH82A.1062//RISSA'S'                                                                                    | A-32086-0P-0P-1A-1C-2C-0C                    | INIA |

|    |               |                                                                                           |                                                |      |
|----|---------------|-------------------------------------------------------------------------------------------|------------------------------------------------|------|
| 49 | QUC 3407-2009 | ALTAR84/CMH82A.1062//RISSA'S'/3CD64399-4P-2P-3P//STN'S'/GOTE'S'                           | A32090-0P-0P-1A-1C-6C-0C                       | INIA |
| 50 | Without Code  | CRAME'S'/PLAC1485                                                                         | A 24819-16P-5P-1P                              | INIA |
| 51 | Without Code  | NACH'S'/CHEN'S'//RUFO'S'/ALD'S'/3/SQLA'S'                                                 | CD79634-1Y-040M-030YRL-2M-2YRL-0PAP            | INIA |
| 52 | Without Code  | ALTAR84/CMH82A1062//RISSA'S'/3/F3LOCAL                                                    | A 27743-0P-2P-1P-2P                            | INIA |
| 53 | Without Code  | CD64399-4P-2P-3P//STN'S'/GOTE'S'                                                          | A27191-0P-7P-2P-1P                             | INIA |
| 54 | Without Code  | CD64399-4P-2P-3P/3/BGTO//SHWA'S'/MAL'S'                                                   | A27182-0P-3P-1P-1P                             | INIA |
| 55 | Without Code  | POHO 1                                                                                    | CD90226-501M-503YRC-502B-0Y                    | INIA |
| 56 | Without Code  | KUCUK                                                                                     | CD91B2620G-2M-030Y-030M                        | INIA |
| 57 | Without Code  | PLAC3089//CHEN'S'/ALTAR                                                                   | A29584-0P-1P-0P-0P-10P                         | INIA |
| 58 | Without Code  | NACH'S'/CHEN'S'//RUFO'S'/ALD'S'/3/SULA'S'/4/F2M.DUR.P.1981-C6                             | A30226-0P-0P-0P-2P                             | INIA |
| 59 | Without Code  | SORA/2*PLATA12//SRN3/NIGRIS4                                                              | CDSS96Y00460S-4Y-0M-0Y-1B-0Y-0B-0B-0B-0B-2Y-0B | INIA |
| 60 | Without Code  | SOMAT3.1//WODUCK/CHAM3/5/AJAIA16//HORA/JRO/3/GAN/4/ZAR                                    | CDSS00Y01093T-0TOPB-2Y-0B-3Y-0B-0Y-0B          | INIA |
| 61 | Without Code  | AJAIA16//HORA/JRO/3/GAN/4/ZAR/5/SUOK7/6/STOT//ALTAR84/ALD                                 | CDSS99B00778S-0TOPY-0M-0Y-129Y-0M-0Y-1B        | INIA |
| 62 | Without Code  | ALTAR84/STINT//SILVER45/3/GUANAY/4/GREEN 14//YAV10/AUK                                    | CDSS99B01260T-0TOPY-0M-0Y-24Y-0M-0Y-0B         | INIA |
| 63 | Without Code  | SOMAT3/3/STOT//ALTAR84/ALD/4/FOCHA1/MUSK4                                                 | CDSS00Y01056T-0TOPB-17Y-0B-8Y-0B-0Y-1B         | INIA |
| 64 | Without Code  | STOT//ALTAR84/ALD/3/THB/CEP7780//2*MUSK4/4AUK/GUIL//GREEN                                 | XXX                                            | INIA |
| 65 | Without Code  | DA-6 Black awns/3/Bcr//Memo/Goo                                                           | ICD96-0058-C-0AP-2AP-0AP-9AP-AP-2AP-0AP-1AP-AP | INIA |
| 66 | Without Code  | 1A.1D 5+10-5/3*MOJO/3/2*TARRO2/MOJO 2//RASCON 33                                          | CDSS96B01149M-0TOPY-4M-0Y-1B-0Y-0B-0B-1Y-0M-0Y | INIA |
| 67 | Without Code  | SOOTY 9/RASCON 37/3/SOOTY 9/TARRO 1//AJAIA 2                                              | CDSS97Y00565S-8Y-0M-0Y-0B-0B-1Y-0M             | INIA |
| 68 | Without Code  | ALTAR 84/STINT//SILVER 45/3/CAMAYO/5/CHEN 11/POC//TANTLO/4/ENTE/MEXI 2//HUI/3/YAV 1/GEDIZ | CDSS99B01112T-0TOPY-0M-0Y-4Y-0M-0Y-0B          | INIA |

|    |               |                                                                                                                         |                                          |      |
|----|---------------|-------------------------------------------------------------------------------------------------------------------------|------------------------------------------|------|
| 69 | Without Code  | STOT//ALTAR84/ALD*2/3/AUK/GUIL//GREEN                                                                                   | CDSS00Y00786T-0TOPB-18Y-0BLR-6Y-0B-0Y-0B | INIA |
| 70 | Without Code  | SOOTY9/RASCON37//SOMAT 3.1                                                                                              | CGSS02Y00003S-1F1-34Y-0B-5Y-0B           | INIA |
| 71 | Without Code  | SOOTY9/RASCON37//STOT//ALTAR//ALTAR84/ALD                                                                               | CGSS02Y00002S-1F1-8Y-50Y-0B              | INIA |
| 72 | QUC 3205-2006 | GUAYACAN<br>INIA/7/YEL'S'/BAR'S'/3/GR'S'/AFN//CR'S'/5/DOM'S'//CR'S'*2/GS'S'/3/                                          | A 31322-0P-0P-0P-0P-1P                   | INIA |
| 73 | QUC 3311-2006 | ALTAR84/CMH82A.1062//RISSA'S'/3/GUAYACAN INIA                                                                           | A-31096-0P-0P-0P-0P-1P-0C                | INIA |
| 74 | QUC 3439-2006 | TEZ'S'/YAV79//HUI'S'/3/SOMO'S'/7/21563/3/LKE/LD399//21563/AA'S'/FG'S'/6/EIP/3/GS'S'/TC60//MEXI'S'/4/SHWA'S'/REN/8/ALTAR | A-31576-0P-0P-0P-0P-1A-0C                | INIA |
| 75 | QUC 3469-2007 | CRANE'S'/PLAC1485/3/ALTAR84/S TINT'S'//SILVER                                                                           | A-31590-0P-0P-0P-0P-1A-0C                | INIA |
| 76 | QUC 3488-2007 | NACH'S'/CHEN'S'//RUFO'S'/ALD'S'/3/SQLA'S'/4/NACH'S'/CHEN'S'//RUFO'S'/ALD'S'/3/SQLA'S'                                   | A-31603-0P-0P-0P-0P-2A-0C                | INIA |
| 77 | QUC 3509-2007 | ATES 2-D/7/<br>YEL'S'/BAR'S'/3/GR'S'/AFN//CR'S'/5/DOM'S'//CR'S'*2/GS'S'                                                 | A-31617-0P-0P-0P-0P-1A-0C                | INIA |
| 78 | QUC 3324-2007 | ALTAR84/STINT'S'//SILVER/3/ETH-LRBR A-133/3*ALTAR84                                                                     | A-31634-0P-0P-0P-0P-1A-0C                | INIA |
| 79 | QUC 3538-2007 | YEL'S'/BAR'S'/3/GR'S'/AFN//CR'S'/5/DOM'S'//CR'S'*2/GS'S'/3/SCO'S'/4/HORA                                                | A-31659-0P-0P-0P-0P-1A-0C                | INIA |
| 80 | QUC 3547-2007 | YEL'S'/BAR'S'/3/GR'S'/AFN//CR'S'/5/DOM'S'//CR'S'*2/GS'S'/3/SCO'S'/4/HORA                                                | A-31660-0P-0P-0P-0P-2A-0C                | INIA |
| 81 | QUC 3412-2007 | YEL'S'/BAR'S'/3/GR'S'/AFN//CR'S'/5/DOM'S'//CR'S'*2/GS'S'/3/SCO'S'/4/HORA                                                | A-31662-0P-0P-0P-0P-1A-0C                | INIA |
| 82 | QUC 3555-2007 | NACH'S'/CHEN'S'//RUFO'S'/ALD'S'/3/SQLA'S'/4/CRANE'S'/PLAC1485                                                           | A-31677-0P-0P-0P-0P-1A-0C                | INIA |
| 83 | QUC 3556-2007 | ALTAR84/CMH82A.1062//RISSA'S'/4/QFN'S'/KILL'S'                                                                          | A-31690-0P-0P-0P-0P-3A-0C                | INIA |
| 84 | QUC 3584-2007 | POHO1/4/ALTAR84/CMH84/CMH82A.1062//RISSA'S'/3/ACONCHI89                                                                 | A-31732-0P-0P-0P-0P-1A-0C                | INIA |
| 85 | QUC 3597-2007 | ALTAR84/STINT'S'//SILVER/7/YEL'S'/BAR'S'/3/GR'S'/AFN//CR'S'/5/DOM'S'//CR'S'*2/GS'S'/3/SCO'S'/4/HORA/6/LAP76/GUIL'S'     | A-31752-0P-0P-0P-0P-3A-0C                | INIA |
| 86 | QUC 3661-2007 | CANELO 9.1//SOOTY 9/RASCON 37                                                                                           | CDSS97Y00285S-1Y-0M-0Y-0B-0B-1Y-0M       | INIA |
| 87 | QUC 3677-2007 | E90035/2*YUAN 1/4/BISU1//CHEN/TEZ/3/HUI//CIT71/CII/5/STOT//ALTAR84/ALD                                                  | CDSS99B00866S-0TOPY-0M-0Y-49Y-0M-0Y-1B   | INIA |

|     |               |                                                                                                                                                                                                        |                                      |      |
|-----|---------------|--------------------------------------------------------------------------------------------------------------------------------------------------------------------------------------------------------|--------------------------------------|------|
| 88  | QUC 3327-2010 | STOT//ALTAR 84/ALD                                                                                                                                                                                     | CD91Y636-1Y-040M-030Y-1M-0Y-0B-1Y-0B | INIA |
| 89  | QUC 3332-2010 | SOMAT_3/PHAX_1//TILO_1/LOTUS_4/3/SOOTY_9/RASCON_37                                                                                                                                                     | CDSS01B00473S-0Y-0M-13Y-0Y           | INIA |
| 90  | QUC 3333-2010 | HYDRANASSA30/SILVER_5/3/AUK/GUIL//GREEN/10/PLATA_10/6/MQUE/4/USDA573//QFN/AA_7/3/ALBA-D/5/AVO/HUI/7/PLATA_13/8/THKNEE_11/9/CHEN/ALTAR 84/3/HUI/POC//BUB/RUFO/4/FNFOOT                                  | CDSS02Y00152S-0Y-0M-16Y-0Y           | INIA |
| 91  | QUC 3334-2010 | PLATA_6/GREEN_17//SNITAN/4/YAZI_1/AKAKI_4//SOMAT_3/3/AUK/GUIL//GREEN                                                                                                                                   | CDSS02Y00369S-0Y-0M-31Y-0Y           | INIA |
| 92  | QUC 3335-2010 | RASCON_37/2*TARRO_2/3/AJAIA_12/F3LOCAL(SEL.ETHIO.135.85)//PLATA_13/4/SORA/2*PLATA_12//SOMAT_3                                                                                                          | CDSS02Y00378S-0Y-0M-7Y-0Y            | INIA |
| 93  | QUC 3336-2010 | RASCON_38/SNITAN/9/USDA595/3/D67.3/RABI//CRA/4/ALO/5/HUI/YAV_1/6/ARDENTE/7/HUI/YAV79/8/PDOD_9                                                                                                          | CDSS02Y00379S-0Y-0M-13Y-0Y           | INIA |
| 94  | QUC 3337-2010 | PORRON_1/MRB589_5//PORRON_1/3/SORA/2*PLATA_12//SOMAT_3/4/RASCON_37/2*TARRO_2                                                                                                                           | CDSS02Y01037T-0TOPB-0Y-0M-3Y-0Y      | INIA |
| 95  | QUC 3338-2010 | LHNKE/HCN//PATA_2/3/SOMAT_4/INTER_8/5/CREX//BOY/YAV_1/3/PLATA_6/4/PORRON_11                                                                                                                            | CDSS02Y01190T-0TOPB-0Y-0M-5Y-0Y      | INIA |
| 96  | QUC 3339-2010 | SOMAT_3/PHAX_1//TILO_1/LOTUS_4/3/2*STOT//ALTAR 84/ALD                                                                                                                                                  | CDSS02Y01267T-0TOPB-0Y-0M-8Y-0Y      | INIA |
| 97  | QUC 3341-2010 | SORA/2*PLATA_12//SOMAT_3/3/SORLOM/4/BICHENA/AKAKI_7                                                                                                                                                    | CDSS02Y01279T-0TOPB-0Y-0M-29Y-0Y     | INIA |
| 98  | QUC 3343-2010 | STORLOM/3/SOMAT_3/PHAX_1//TILO_1/LOTUS_4                                                                                                                                                               | CDSS02B00004S-0Y-0M-24Y-1M-04Y-0B    | INIA |
| 99  | QUC 3344-2010 | CHEN_1/TEZ/3/GUIL//CIT71/CII/4/SORA/PLATA_12/5/STOT//ALTAR 84/ALD/6/SOMAT_3/PHAX_1//TILO_1/LOTUS_4                                                                                                     | CDSS02B00021S-0Y-0M-25Y-2M-04Y-0B    | INIA |
| 100 | QUC 3345-2010 | VRKS_3/7/ENTE/MEXI_2//HUI/4/YAV_1/3/LD357E/2*TC60//JO69/5/BISU/6/RYP26_2/10/PLATA_10/6/MQUE/4/USDA573//QFN/AA_7/3/ALBA-D/5/AVO/HUI/7/PLATA_13/8/THKNEE_11/9/CHEN/ALTAR 84/3/HUI/POC//BUB/RUFO/4/FNFOOT | CDSS02B00145S-0Y-0M-9Y-1M-04Y-0B     | INIA |

|     |               |                                                                                                                                                                           |                                         |      |
|-----|---------------|---------------------------------------------------------------------------------------------------------------------------------------------------------------------------|-----------------------------------------|------|
| 101 | QUC 3346-2010 | SOOTY_9/RASCON_37/3/SOOTY_9/TARRO_1//AJAIA_2/10/PLATA_10/6/MQUE/4/USDA573//QFN/AA_7/3/ALBA-D/5/AVO/HUI/7/PLATA_13/8/THKNEE_11/9/CHEN/ALTAR84/3/HUI/POC//BUB/RUFO/4/FNFOOT | CDSS02B00379S-0Y-0M-24Y-4M-04Y-0B       | INIA |
| 102 | QUC 3347-2010 | SOOTY_9/RASCON_37//TILO_1/LOTUS_4/9/USDA595/3/D67.3/RABI//CRA/4/ALO/5/HUI/YAV_1/6/ARDENTE/7/HUI/YAV79/8/POD_9                                                             | CDSS02B00380S-0Y-0M-4Y-3M-04Y-0B        | INIA |
| 103 | QUC 3348-2010 | SHAG_21/DIPPER_2//PATA_2/6/ARAM_7//CREX/ALLA/5/ENTE/MEXI_2//HUI/4/YAV_1/3/LD357E/2*TC60//JO69/7/ARMENT//SRN_3/NIGRIS_4/3/CANELO_9.1                                       | CDSS02B00443S-0Y-0M-15Y-3M-04Y-0B       | INIA |
| 104 | QUC 3349-2010 | TADIZ/9/USDA595/3/D67.3/RABI//CRA/4/ALO/5/HUI/YAV_1/6/ARDENTE/7/HUI/YAV79/8/POD_9                                                                                         | CDSS02B00455S-0Y-0M-6Y-4M-04Y-0B        | INIA |
| 105 | QUC 3351-2010 | LOTUS_5/SORD_1/3/CANELO_8//SORA/2*PLATA_12/9/USDA595/3/D67.3/RABI//CRA/4/ALO/5/HUI/YAV_1/6/ARDENTE/7/HUI/YAV79/8/POD_9                                                    | CDSS02B00770T-0TOPB-0Y-0M-17Y-2M-04Y-0B | INIA |
| 106 | QUC 3352-2010 | SOMAT_4/SILVER_1/4/STORLOM/3/RASCON_37/TARRO_2//RASCON_37/5/PATKA_4/PLATA_16                                                                                              | CDSS02B00964T-0TOPB-0Y-0M-7Y-1M-04Y-0B  | INIA |
| 107 | QUC 3353-2010 | SNITAN/5/AJAIA_12/F3LOCAL(SELETHIO.135.85)//PLATA_13/3/SOMAT_3/4/SOOTY_9/RASCON_37/6/SNITAN                                                                               | CDSS02B01019T-0TOPB-0Y-0M-3Y-4M-04Y-0B  | INIA |
| 108 | QUC 3354-2010 | DIPPER_2/BUSHEN_3//SNITAN/3/SOMAT_3/PHAX_1//TILO_1/LOTUS_4/5/PATIN_7//HUI/YAV79/3/AJAIA_12/F3LOCAL(SELETHIO.135.85)//PLATA_13/4/RASCON_37/GREEN_2                         | CDSS02B01086T-0TOPB-0Y-0M-2Y-2M-04Y-0B  | INIA |
| 109 | QUC 3355-2010 | MINIMUS/COMB DUCK_2//CHAM_3/3/RCOL*2/4/SOMAT_4/INTER_8                                                                                                                    | CDSS02B01108T-0TOPB-0Y-0M-5Y-4M-04Y-0B  | INIA |
| 110 | QUC 3356-2010 | TARRO_1/2*YUAN_1//AJAIA_13/YAZI/3/SOMAT_3/PHAX_1//TILO_1/LOTUS_4/4/CANELO_8//SORA/2*PLATA_12                                                                              | CDSS02B01143T-0TOPB-0Y-0M-3Y-4M-04Y-0B  | INIA |
| 111 | QUC 3357-2010 | CF4-JS40//SOOTY_9/RASCON_37/4/CNDO/PRIMADUR//HAI-OU_17/3/SNITAN                                                                                                           | CDSS02B01336T-0TOPB-0Y-0M-1Y-3M-04Y-0B  | INIA |

|     |               |                                                                                                                                                                                                                                                   |                                        |      |
|-----|---------------|---------------------------------------------------------------------------------------------------------------------------------------------------------------------------------------------------------------------------------------------------|----------------------------------------|------|
| 112 | QUC 3358-2010 | CF4-JS<br>40/10/PLATA_10/6/MQUE/4/USDA573//QFN/AA_7/3/ALBA-D/5/AVO/HUI/7/PLATA_13/8/THKNEE_11/9/CHEN/ALTAR<br>84/3/HUI/POC//BUB/RUFO/4/FNFO<br>OT/11/PATIN_7//HUI/YAV79/3/AJ<br>IA_12/F3LOCAL(SEL.ETHIO.135.85)<br>//PLATA_13/4/RASCON_37/GREEN_2 | CDSS02B01339T-0TOPB-0Y-0M-4Y-1M-04Y-0B | INIA |
| 113 | QUC 3359-2010 | HUBEI//SOOTY_9/RASCON_37/3/2<br>*SOOTY_9/RASCON_37/4/SOOTY_9/RASCON_37/5/SOOTY_9/RASCON_37                                                                                                                                                        | CDSS02B01428T-0TOPB-0Y-0M-1Y-3M-04Y-0B | INIA |
| 114 | QUC 3361-2010 | CMH79.1159/POC//CRAKE_10/RISSA/9/USDA595/3/D67.3/RABI//CRA/4/ALO/5/HUI/YAV_1/6/ARDENTE/7/HUI/YAV79/8/POD_9                                                                                                                                        | CDSS02B01456T-0TOPB-0Y-0M-9Y-4M-04Y-0B | INIA |
| 115 | Without Code  | PATKA_7/YAZI_1//FICHE_6/3/SOOTY_9/RASCON_37/4/SOMAT_3/PHAX_1//TILO_1/LOTUS_4/5/SOOTY_9/RASCON_37                                                                                                                                                  | CDSS02B01161T-0TOPB-0Y-0M-5Y-1M-04Y-0B | INIA |
| 116 | Without Code  | WDRAIL_1/TOSKA_26//PLATA_6/GREEN_17/3/SORA/2*PLATA_12//SOMAT_3/4/SORA/2*PLATA_12//RASCON_37                                                                                                                                                       | CDSS02B01194T-0TOPB-0Y-0M-1Y-1M-04Y-0B | INIA |
| 117 | Without Code  | RASCON_37/4/MAGH72/RUFO//ALG86/RU/3/PLATA_16/5/PORTO_3*2/6/ARMENT//SRN_3/NIGRIS_4/3/CANELO_9.1                                                                                                                                                    | CDSS02B01204T-0TOPB-0Y-0M-8Y-3M-04Y-0B | INIA |
| 118 | Without Code  | D86135/ACO89//PORRON_4/3/SNITAN/4/ALTAR<br>84<br>ALTO_1/RASCON_19/5/D86135/ACO89//PORRON_4/3/SNITAN                                                                                                                                               | CDSS02B01255T-0TOPB-0Y-0M-3Y-2M-04Y-0B | INIA |
| 119 | Without Code  | PON_3//SORA/2*PLATA_12/3/SNITAN/SOMAT_3//FULVOUS_1/MFOWL_13/4/BICHENA/AKAKI_7                                                                                                                                                                     | CDSS02B01273T-0TOPB-0Y-0M-4Y-1M-04Y-0B | INIA |
| 120 | Without Code  | P91.272.3.1/2*MEXI75//2*SOOTY_9/RASCON_37                                                                                                                                                                                                         | CDSS02B01532T-0TOPB-0Y-0M-1Y-1M-04Y-0B | INIA |
| 121 | Without Code  | RISSA/GAN//POHO_1/3/PLATA_3//CREX/ALLA*2/4/ARMENT//SRN_3/NIGRIS_4/3/CANELO_9.1                                                                                                                                                                    | CDSS02B01131T-0TOPB-0Y-0M-5Y-4M-04Y-0B | INIA |
| 122 | Without Code  | TARRO_1/2*YUAN_1//AJAIA_13/YAZI*2/9/USDA595/3/D67.3/RABI//CRA/4/ALO/5/HUI/YAV_1/6/ARDENTE/7/HUI/YAV79/8/POD_9                                                                                                                                     | CDSS02B01141T-0TOPB-0Y-0M-3Y-4M-04Y-0B | INIA |
| 123 | Without Code  | TARRO_1/2*YUAN_1//AJAIA_13/YAZI*2/4/ARMENT//SRN_3/NIGRIS_4/3/CANELO_9.1                                                                                                                                                                           | CDSS02B01142T-0TOPB-0Y-0M-1Y-3M-04Y-0B | INIA |



|     |              |                                                                                                                                                                         |                                                 |      |
|-----|--------------|-------------------------------------------------------------------------------------------------------------------------------------------------------------------------|-------------------------------------------------|------|
| 124 | Without Code | MINIMUS/COMB<br>DUCK_2//CHAM_3/3/FICHE_6/4/M<br>OJO/AIRON/5/SOMAT_3.1/6/CHEN/<br>ALTAR<br>84/3/HUI/POC//BUB/RUFO/4/FNFO<br>OT/5/TILO_1/LOTUS_4                          | CDSS02B01159T-<br>0TOPB-0Y-0M-3Y-<br>2M-04Y-0B  | INIA |
| 125 | Without Code | GARAVITO_2/4/MAGH72/RUFO//A<br>LG86/RU/3/PLATA_16/5/PATA_2/6/<br>SOMAT_4/INTER_8/7//SRN_3/NIGR<br>IS_4//SHIP_1                                                          | CDSS02B01199T-<br>0TOPB-0Y-0M-1Y-<br>2M-04Y-0B  | INIA |
| 126 | Without Code | SORA/2*PLATA_12//RASCON_37/4<br>/ARMENT//SRN_3/NIGRIS_4/3/CA<br>NELO_9.1/5/KITTI_1/DUKEM_4//5*<br>KITTI_1/3/ADAMAR_15                                                   | CDSS02B01236T-<br>0TOPB-0Y-0M-4Y-<br>1M-04Y-0B  | INIA |
| 127 | Without Code | LHNKE/HCN//PATA_2/3/SOMAT_4<br>/INTER_8/4/PLATA_6/GREEN_17//S<br>NITAN                                                                                                  | CDSS02B01243T-<br>0TOPB-0Y-0M-5Y-<br>1M-04Y-0B  | INIA |
| 128 | Without Code | D86135/ACO89//PORRON_4/3/SNIT<br>AN/4/TATLER_1/TARRO_1//HYDR<br>ANASSA30/SILVER_5/5/D86135/AC<br>O89//PORRON_4/3/SNITAN                                                 | CDSS02B01253T-<br>0TOPB-0Y-0M-6Y-<br>4M-04Y-0B  | INIA |
| 129 | Without Code | PLATA_6/GREEN_17/3/CHEN/AUK<br>//BISU*2/5/PLATA_3//CREX/ALLA/<br>3/SOMBRA_20/4/SILVER_14/MOE<br>WE                                                                      | CDSS02B01266T-<br>0TOPB-0Y-0M-10Y-<br>3M-04Y-0B | INIA |
| 130 | Without Code | POD_20//SULA/ACO89/3/SORA/2*P<br>LATA_12//SOMAT_3/4/PATKA_4/T<br>HKNEE_9//CABECA_1                                                                                      | CDSS02B01271T-<br>0TOPB-0Y-0M-7Y-<br>3M-04Y-0B  | INIA |
| 131 | Without Code | RASCON_37/2*TARRO_2/3/AJAIA_<br>12/F3LOCAL(SEL.ETHIO.135.85)//P<br>LATA_13/4/SORA/2*PLATA_12//SO<br>MAT_3/5/EUPODA_3/SLA_2//MINI<br>MUS                                 | CDSS02B01274T-<br>0TOPB-0Y-0M-3Y-<br>2M-04Y-0B  | INIA |
| 132 | Without Code | THKNEE_11/SNITAN*2//SOMAT_4<br>/INTER_8                                                                                                                                 | CDSS02B01283T-<br>0TOPB-0Y-0M-2Y-<br>3M-04Y-0B  | INIA |
| 133 | Without Code | TOPDY_18/FOCHA_1//ALTAR<br>84/3/AJAIA_12/F3LOCAL(SEL.ETHI<br>O.135.85)//PLATA_13/4/SOMAT_3/<br>GREEN_22/5/VRKS_3/3/AJAIA_12/<br>F3LOCAL(SEL.ETHIO.135.85)//PLA<br>TA_13 | CDSS02B01285T-<br>0TOPB-0Y-0M-5Y-<br>1M-04Y-0B  | INIA |
| 134 | Without Code | TOSKA_26/RASCON_37//SNITAN*<br>2/4/ARMENT//SRN_3/NIGRIS_4/3/C<br>ANELO_9.1                                                                                              | CDSS02B01286T-<br>0TOPB-0Y-0M-2Y-<br>4M-04Y-0B  | INIA |
| 135 | Without Code | 1A.ID<br>5+10-<br>6/3*MOJO//RCOL/3/SNITAN/SOMA<br>T_3//FULVOUS_1/MFOWL_13/4/IN<br>TER_16/SNITAN                                                                         | CDSS02B01292T-<br>0TOPB-0Y-0M-1Y-<br>2M-04Y-0B  | INIA |
| 136 | Without Code | CMH85.797//DUKEM_12/2*RASCO<br>N_21/9/USDA595/3/D67.3/RABI//CR<br>A/4/ALO/5/HUI/YAV_1/6/ARDENT<br>E/7/HUI/YAV79/8/POD_9                                                 | CDSS02B01465T-<br>0TOPB-0Y-0M-16Y-<br>4M-04Y-0B | INIA |

|     |              |                                                                                                              |                                                |        |
|-----|--------------|--------------------------------------------------------------------------------------------------------------|------------------------------------------------|--------|
| 137 | Without Code | WELLO<br>1052/3/TARRO_1/TISOMA_2//TARRO_1/4/2*DUKEM_12/2*RASCON_21                                           | 1/DZ<br>CDSS02B01524T-0TOPB-0Y-0M-1Y-2M-04Y-0B | INIA   |
| 138 | Without Code | ADAMAR/4/CHEN_1/TEZ/3/GUIL//CIT71/CII/5/SORA/2*PLATA_12//SOMAT_3/6/MINIMUS/COMB<br>DUCK_2//CHAM_3/3/GREEN_19 | CDSS02B01246T-0TOPB-0Y-0M-9Y-4M-04Y-0B         | INIA   |
| 139 | Without Code | Mrb5                                                                                                         | XXX                                            | ICARDA |
| 140 | Without Code | Azeghar-1                                                                                                    | ICD92-0511-MABL-0AP-16AP-0TR-9AP-0AP           | ICARDA |
| 141 | Without Code | Gcn/4/D68-1-93A-1A//Ruff/Fg/3/Mtl-5                                                                          | ICD95-1302-C-3AP-0AP-1AP-0AP-5AP-AP-3AP-0AP    | ICARDA |
| 142 | Without Code | Gdr2                                                                                                         | xxx                                            | ICARDA |
| 143 | Without Code | Bcr/Gro1//Mgn1                                                                                               | ICD97-0396-T-1AP-AP-6AP-0AP-6AP-AP             | ICARDA |
| 144 | Without Code | Krf                                                                                                          | XXX                                            | ICARDA |
| 145 | Without Code | Mgn13/Aghrass2                                                                                               | ICD99-0015-C-8AP-AP-6AP-AP                     | ICARDA |
| 146 | Without Code | Bicredera1/3/Stj3//Dra2/Bcr                                                                                  | ICD99-0861-C-14AP-AP-14AP-AP                   | ICARDA |
| 147 | Without Code | Bcr/Lks4/Mrf1/Stj2                                                                                           | ICD99-0886-C-17AP-AP-3AP-AP                    | ICARDA |
| 148 | Without Code | Mrf/Stj2//Bcrch1                                                                                             | ICD99-0027-C-0AP-14AP-AP-7AP-AP                | ICARDA |
| 149 | Without Code | Stj3//Dra2/Bcr/3/Ter-3                                                                                       | ICD99-0036-C-0AP-21AP-AP-13AP-AP               | ICARDA |
| 150 | Without Code | Hau                                                                                                          | XXX                                            | ICARDA |
| 151 | Without Code | Waha                                                                                                         | XXX                                            | ICARDA |
| 152 | Without Code | Kulrengi/Balikcil8//Aghrass2                                                                                 | ICD99-0211-T-2AP-AP-11AP-AP                    | ICARDA |
| 153 | Without Code | Ter-1/3/Mrf1//Mrb16/Ru                                                                                       | ICD99-1024-T-0AP-6AP-AP-6AP-AP                 | ICARDA |
| 154 | Without Code | Ter-1/3/Stj3//Bcr/Lks4                                                                                       | ICD99-1036-T-0AP-1AP-AP-9AP-AP                 | ICARDA |
| 155 | Without Code | Azegar-2//Ch1/F1 13                                                                                          | ICD98-0493-W-AP-2AP-0AP-6AP-AP-6AP-AP          | ICARDA |
| 156 | Without Code | Icasyr-2                                                                                                     | ICD95-0169-C-0AP-2AP-0AP-4AP-0AP               | ICARDA |
| 157 | Without Code | Ammar-1                                                                                                      | ICD94-0918-C-12AP-0AP-4AP-0AP-4AP-0AP          | ICARDA |
| 158 | Without Code | Mrf1/Stj2//Gdr2/Mgn1                                                                                         | ICD01-0946-C-AP-13AP-TR                        | ICARDA |
| 159 | Without Code | Aghrass-1/3/Mrf1//Mrb16/Ru                                                                                   | ICD00-0834-C-32AP-AP-6AP-TR                    | ICARDA |

|     |              |                                                                                |                                                        |        |
|-----|--------------|--------------------------------------------------------------------------------|--------------------------------------------------------|--------|
| 160 | Without Code | Gsbl1/4/D68-1-93A-1A//Ruff/Fg/3/Mtl5/5/Wdz6/Gil4                               | ICD01-0995-T-AP-2AP-AP                                 | ICARDA |
| 161 | Without Code | Bicredera-1/Azeghar-2                                                          | ICD01-1060-T-AP-1AP-TR                                 | ICARDA |
| 162 | Without Code | 13376/Bcrch1//Ossl1/Stj5                                                       | ICD00-0360-T-8AP-AP-2AP-TR                             | ICARDA |
| 163 | Without Code | Ysf-1/3/Altar84/Stn//Wdz-2                                                     | ICD00-0999-T-7AP-AP-2AP-AP                             | ICARDA |
| 165 | Without Code | Azn-1//Ossl-1/Gdfl                                                             | ICD00-0898-H-18AP-AP-6AP-TR                            | ICARDA |
| 166 | Without Code | Azn-1/3/Mrf2//Bcr/Gro1                                                         | ICD00-0900-H-23AP-AP-2AP-TR                            | ICARDA |
| 167 | Without Code | Bcrch-1/3/Mrf2//Bcr/Gro1                                                       | ICD00-0928-H-4AP-AP-4AP-TR                             | ICARDA |
| 168 | Without Code | Msbl-1//Krf/Hcn                                                                | ICD95-1133-T-0AP-1AP-0AP-3AP-0TR-2AP-AP                | ICARDA |
| 169 | Without Code | Adnan-2                                                                        | ICD99-0846-C-13AP-0AP-5AP-AP-6AP-AP                    | ICARDA |
| 170 | Without Code | Bcrch1//Mrf1/Stj2                                                              | ICD97-0494-T-13AP-AP-5AP-0AP-16AP-AP                   | ICARDA |
| 171 | Without Code | Ter-1//Mrf1/Stj2                                                               | ICD99-0866-C-0AP-5AP-AP-5AP-AP                         | ICARDA |
| 172 | Without Code | Mgnl3/Ainzen-1                                                                 | ICD98-0043-C-3AP-0AP-8AP-AP-4AP-AP                     | ICARDA |
| 173 | Without Code | Sjt3//Bcr/Lks4/3/Ter-3                                                         | ICD99-0091-T-3AP-AP-6AP-AP                             | ICARDA |
| 174 | Without Code | HFN94N-37/Mrb5/3/Brch/T.dic 20017//Hcn                                         | ICD95-0638-T-0AP-3AP-0AP-4AP-0TR-3AP-AP-2AP-0AP-2AP-AP | ICARDA |
| 175 | Without Code | Bcr/Lks4/4/BEZAIZ-SHF//SD-19539/Waha/3/Stj/Mrb3/5/Ossl1/Stj5                   | ICD00-0389-T-AP-5AP-AP                                 | ICARDA |
| 176 | Without Code | Cl115/Azn1/5/Villemur/3/Lahn//Gs/Stk/4/Dra2/Bcr                                | ICD00-0432-T-AP-13AP-AP                                | ICARDA |
| 177 | Without Code | Aghrass-1/3/HFN94N-8/Mrb5//Zna-1                                               | ICD00-1085-T-10AP-AP-10AP-AP                           | ICARDA |
| 178 | Without Code | Ter-2/3/HFN94N-8/Mrb5//Zna-1                                                   | ICD00-1090-T-2AP-AP-2AP-AP-TR                          | ICARDA |
| 179 | Without Code | Villemur/3/Lahn//Gs/Stk/4/Dra2/Bcr/Lks4/4/BEZAIZ-SHF//SD-19539/Waha/3/Sjt/Mrb3 | ICD00-0388-T-AP-12AP-AP-1AP-TR                         | ICARDA |
| 180 | Without Code | Aghrass-1/Bezaiz98-1                                                           | ICD00-0018-T-19AP-AP-2AP-TR                            | ICARDA |
| 181 | Without Code | Massara-1/4/Aus1/3/Scar/Gdo VZ579//Bit                                         | ICD95-0916-C-2AP-0AP-3AP-0AP-12AP-AP-12AP-0AP          | ICARDA |
| 182 | Without Code | Ouasbar-2                                                                      | ICD96-0746-C-3AP-0AP-6AP-0AP                           | ICARDA |
| 183 | Without Code | Razzak/4/21563/AA//Fg/3/D68-10-2A-2A-1A/5/Aghrass2                             | ICD99-0368-T-11AP-AP-9AP-AP                            | ICARDA |
| 184 | Without Code | Akaki7/Lotus4//Himan9                                                          | XXX                                                    | ICARDA |

|     |              |                              |     |        |
|-----|--------------|------------------------------|-----|--------|
| 185 | Without Code | Altar84/Cas                  | XXX | ICARDA |
| 186 | Without Code | Tapdy/Rascon33               | XXX | ICARDA |
| 187 | Without Code | ETH-LRBRA1-138(74)/3*Altar84 | XXX | ICARDA |
